# Supplementary material for: Effects of Ciprofloxacin Alone or in Mixture with Sulfamethoxazole on the Efficiency of Anaerobic Digestion and Its Microbial Community
Source: MDPI journal article supplement (doi:10.3390/antibiotics11081111), 2022-08-17
Supplement: s1 [file s1]

Supplemental Materials

# Effects of Ciprofloxacin Alone or in Mixture with Sulfamethoxazole on the Efficiency of Anaerobic Digestion and Its Microbial Community

Valentina Mazzurco Miritana <sup>1,2</sup>, Luisa Patrolecco <sup>3,\*</sup>, Anna Barra Caracciolo <sup>2,\*</sup>, Andrea Visca <sup>2</sup>, Flavia Piccinini <sup>1</sup>, Antonella Signorini <sup>1</sup>, Silvia Rosa <sup>1</sup>, Paola Grenni <sup>2</sup>, Gian Luigi Garbini <sup>2</sup>, Francesca Spataro <sup>3</sup>, Jasmin Raueo <sup>3</sup> and Giulia Massini <sup>1,2</sup>

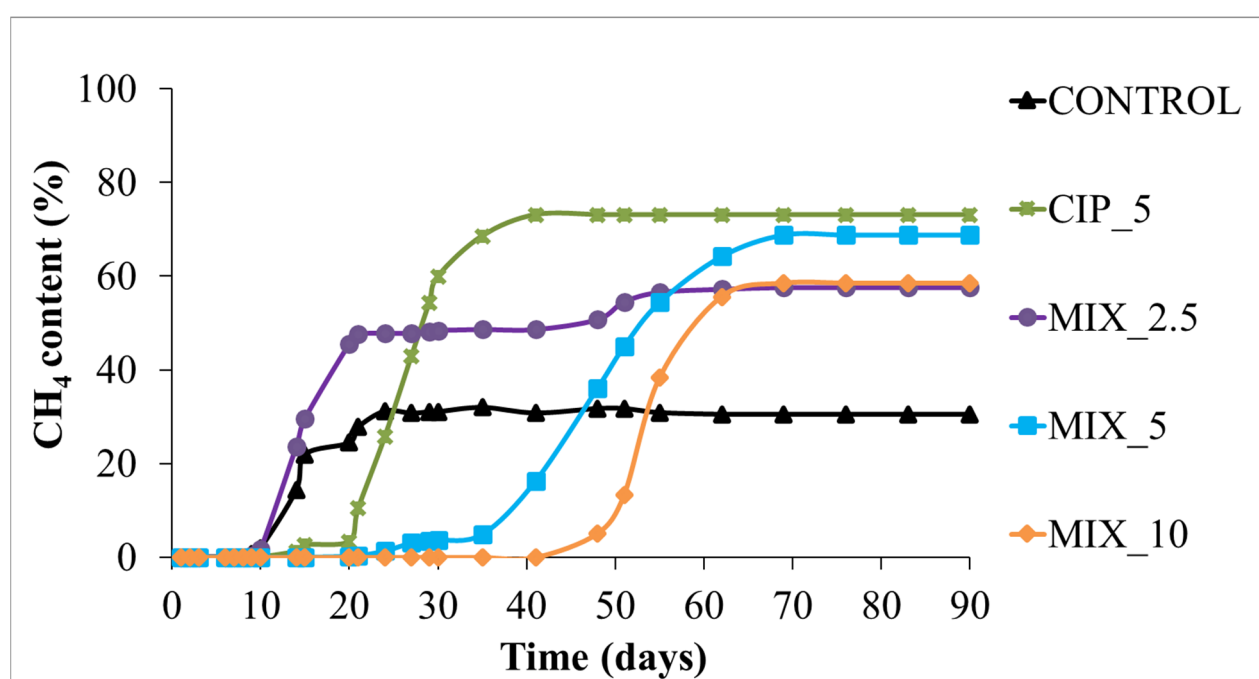

**Figure S1.** CH<sub>4</sub> content (%) in biogas produced over time by different experimental conditions.
